# Supplementary material for: Urethane Synthesis in the Presence of Organic Acid Catalysts—A Computational Study
Source: MDPI journal article supplement (doi:10.3390/molecules29102375), 2024-05-17
Supplement: s1 [file s1]

# Urethane Synthesis in the Presence of Organic Acid Catalysts - A Computational Study

Hadeer Q. Waleed <sup>1,2</sup>, Béla Viskolcz <sup>1</sup>, and Béla Fiser <sup>2,3,4,\*</sup>

<sup>1</sup> Institute of Chemistry, University of Miskolc, 3515 Miskolc-Egyetemváros, Hungary

<sup>2</sup> Higher Education and Industrial Cooperation Centre, University of Miskolc, 3515 Miskolc-Egyetemváros, Hungary

<sup>3</sup> Ferenc Rakoczi II Transcarpathian Hungarian College of Higher Education, 90200 Beregszász, Transcarpathia, Ukraine

<sup>4</sup> Department of Physical Chemistry, Faculty of Chemistry, University of Lodz, Lodz, Poland

\* Correspondence: bela.fiser@uni-miskolc.hu (B.F.)

## Supporting Information

**Table S1.** Zero-point corrected relative energies ( $\Delta_r E_0$ ), relative enthalpies ( $\Delta_r H$ ), relative Gibbs free energies ( $\Delta_r G$ ), and relative entropies ( $\Delta_r S$ ) of the reaction between phenyl isocyanate and butan-1-ol in presence of the studied catalysts, dimethyl hydrogen phosphate (DMHP), methanesulfonic acid (MSA), and trifluoromethanesulfonic acid (TFMSA) calculated at the BHandHLYP/6-31G(d) level of theory in acetonitrile using the SMD implicit solvent model at 298.15 K and 1 atm. R – reactant, RC – reactant complex, TS – transition state, IM – intermediate, PC – product complex, P – product.

| $\Delta_r E_0$ (kJ/mol)  |     |        |        |        |         |         |
|--------------------------|-----|--------|--------|--------|---------|---------|
|                          | R   | RC1    | RC2    | TS     | PC      | P       |
| Cat.-free                | 0.0 | -      | -10.48 | 122.75 | -       | -120.94 |
| DMHP                     | 0.0 | -21.67 | -41.77 | -7.93  | -151.94 | -120.94 |
| MSA                      | 0.0 | -13.19 | -34.19 | 0.53   | -144.67 | -120.94 |
| TFMSA                    | 0.0 | -9.95  | -35.97 | -25.77 | -146.28 | -120.94 |
| $\Delta_r H$ (kJ/mol)    |     |        |        |        |         |         |
|                          | R   | RC1    | RC2    | TS     | PC      | P       |
| Cat.-free                | 0.0 | -      | -8.23  | 120.13 | -       | -123.20 |
| DMHP                     | 0.0 | -19.32 | -38.12 | -9.40  | -153.13 | -123.20 |
| MSA                      | 0.0 | -11.42 | -30.82 | -1.35  | -145.96 | -123.20 |
| TFMSA                    | 0.0 | -7.28  | -32.57 | -24.36 | -147.11 | -123.20 |
| $\Delta_r G$ (kJ/mol)    |     |        |        |        |         |         |
|                          | R   | RC1    | RC2    | TS     | PC      | P       |
| Cat.-free                | 0.0 | -      | 29.65  | 173.69 | -       | -69.89  |
| DMHP                     | 0.0 | 13.78  | 43.57  | 92.46  | -51.18  | -69.89  |
| MSA                      | 0.0 | 25.74  | 52.01  | 98.52  | -45.29  | -69.89  |
| TFMSA                    | 0.0 | 30.20  | 56.17  | 67.24  | -47.89  | -69.89  |
| $\Delta_r S$ (cal/mol*K) |     |        |        |        |         |         |
|                          | R   | RC1    | RC2    | TS     | PC      | P       |
| Cat.-free                | 0.0 | -      | -30.37 | -42.94 | -       | -42.73  |
| DMHP                     | 0.0 | -26.54 | -65.49 | -81.66 | -81.73  | -42.73  |

|              |     |        |        |        |        |        |
|--------------|-----|--------|--------|--------|--------|--------|
| <b>MSA</b>   | 0.0 | -29.79 | -66.40 | -80.06 | -80.71 | -42.73 |
| <b>TFMSA</b> | 0.0 | -30.04 | -71.14 | -73.43 | -79.54 | -42.73 |

\* RC for catalyst-free (cat.-free) reaction.

**Table S2.** Zero-point corrected relative energies ( $\Delta_r E_0$ ), relative enthalpies ( $\Delta_r H$ ), relative Gibbs free energies ( $\Delta_r G$ ), and relative entropies ( $\Delta_r S$ ) of the reaction between phenyl isocyanate and butan-1-ol in presence of the studied catalysts, dimethyl hydrogen phosphate (DMHP), methanesulfonic acid (MSA), and trifluoromethanesulfonic acid (TFMSA) calculated at the G3MP2BHandHLYP/6-31G(d) level of theory in acetonitrile using the SMD implicit solvent model at 298.15 K and 1 atm. R – reactant, RC – reactant complex, TS – transition state, IM – intermediate, PC – product complex, P – product.

| $\Delta_r E_0$ (kJ/mol)  |     |        |        |        |         |        |
|--------------------------|-----|--------|--------|--------|---------|--------|
|                          | R   | RC1    | RC2    | TS     | PC      | P      |
| <b>Cat.-free</b>         | 0.0 | -      | -11.22 | 119.11 | -       | -92.58 |
| <b>DMHP</b>              | 0.0 | -20.44 | -51.44 | -13.84 | -131.93 | -92.58 |
| <b>MSA</b>               | 0.0 | -10.44 | -44.68 | -6.57  | -123.71 | -92.58 |
| <b>TFMSA</b>             | 0.0 | -9.61  | -49.35 | -44.25 | -129.63 | -92.58 |
| $\Delta_r G$ (kJ/mol)    |     |        |        |        |         |        |
|                          | R   | RC1    | RC2    | TS     | PC      | P      |
| <b>Cat.-free</b>         | 0.0 | -      | 28.91  | 170.05 | -       | -41.54 |
| <b>DMHP</b>              | 0.0 | 15.02  | 33.91  | 86.56  | -31.17  | -41.54 |
| <b>MSA</b>               | 0.0 | 28.50  | 41.53  | 91.43  | -24.33  | -41.54 |
| <b>TFMSA</b>             | 0.0 | 30.54  | 42.80  | 48.75  | -31.24  | -41.54 |
| $\Delta_r S$ (cal/mol*K) |     |        |        |        |         |        |
|                          | R   | RC1    | RC2    | TS     | PC      | P      |
| <b>Cat.-free</b>         | 0.0 | -      | -30.36 | -42.94 | -       | -42.73 |
| <b>DMHP</b>              | 0.0 | -26.54 | -65.48 | -81.66 | -81.73  | -42.73 |
| <b>MSA</b>               | 0.0 | -35.33 | -66.40 | -80.06 | -80.71  | -42.73 |
| <b>TFMSA</b>             | 0.0 | -35.59 | -71.14 | -73.43 | -79.54  | -42.73 |

'RC for catalyst-free (cat.-free) reaction.

**Table S3.** Cartesian coordinates of the stationary points for the studied species. The structures calculated at the BHandHLYP/6-31G(d) level of theory in acetonitrile at 298.15 K and 1 atm. Cat.-catalysts, RC – reactant complex, TS – transition state, IM – intermediate, PC – product complex, P – product.

**Keywords included in the input files to carry out the calculations on the studied structures:**

# BHandHLYP/6-31g(d) opt=(tight) freq scrf=(smd,solvent=acetonitrile)  
 #BHandHLYP/6-31g(d) opt=(calcf,tight,ts,noeigentest) freq scrf=(smd,solvent=acetonitrile)  
 # MP2/GTMP2large scrf=(smd,solvent=acetonitrile)  
 # QCISD(T)/6-31G(d) scrf=(smd,solvent=acetonitrile)

| <b>DMHP</b> |             |             |             | <b>DMHP-RC1</b> |            |             |             |
|-------------|-------------|-------------|-------------|-----------------|------------|-------------|-------------|
| O           | 0.54336800  | 1.64949200  | -0.77148500 | O               | 1.64285200 | -1.01233300 | 1.04050700  |
| P           | 0.02743800  | 0.45721300  | -0.09567600 | C               | 2.36664900 | -0.48912000 | -0.04469800 |
| O           | 0.03813000  | 0.54766500  | 1.49910600  | H               | 0.72085800 | -1.09591200 | 0.76428700  |
| O           | -1.44868800 | 0.11245900  | -0.52508800 | H               | 1.95428400 | 0.47310500  | -0.36178500 |
| O           | 0.77257000  | -0.91233100 | -0.34554100 | H               | 2.31150500 | -1.15708600 | -0.90967900 |
| H           | -0.02815900 | 1.45581000  | 1.81581300  | C               | 3.81252800 | -0.31098600 | 0.36602100  |
| C           | 2.15538000  | -1.06019100 | -0.00669500 | H               | 3.84924400 | 0.35211100  | 1.23108000  |
| H           | 2.44588200  | -2.05099000 | -0.32994200 | H               | 4.20168300 | -1.27538700 | 0.69445300  |

|          |             |             |             |         |             |             |             |
|----------|-------------|-------------|-------------|---------|-------------|-------------|-------------|
| H        | 2.75243300  | -0.31656500 | -0.52351900 | C       | 4.68620000  | 0.24576500  | -0.74985600 |
| H        | 2.29026800  | -0.96863900 | 1.06549500  | H       | 4.28448200  | 1.20459000  | -1.07957800 |
| C        | -2.16391600 | -0.99868100 | 0.02356300  | H       | 4.63744000  | -0.41919900 | -1.61287200 |
| H        | -3.16994200 | -0.93750000 | -0.37011100 | C       | 6.13790000  | 0.42378700  | -0.33054300 |
| H        | -1.70327300 | -1.92990000 | -0.28569600 | H       | 6.73991000  | 0.82236900  | -1.14483700 |
| H        | -2.19058700 | -0.93545200 | 1.10596200  | H       | 6.22207400  | 1.11037700  | 0.51060200  |
|          |             |             |             | H       | 6.57800200  | -0.52490600 | -0.02678600 |
|          |             |             |             | O       | -0.99318500 | -1.14588900 | 0.12378500  |
|          |             |             |             | P       | -2.02154100 | -0.09438500 | 0.13939100  |
|          |             |             |             | O       | -2.91963900 | -0.08432900 | 1.45488600  |
|          |             |             |             | O       | -1.39855400 | 1.33912900  | -0.01808500 |
|          |             |             |             | O       | -3.10175700 | -0.13274300 | -1.00428000 |
|          |             |             |             | H       | -2.45359400 | -0.41780200 | 2.23079300  |
|          |             |             |             | C       | -3.95763300 | -1.27074400 | -1.17203200 |
|          |             |             |             | H       | -4.55571600 | -1.07385700 | -2.05143900 |
|          |             |             |             | H       | -3.36567700 | -2.16671200 | -1.32236700 |
|          |             |             |             | H       | -4.60008900 | -1.38515900 | -0.30625500 |
|          |             |             |             | C       | -2.19677300 | 2.52938400  | 0.00983100  |
|          |             |             |             | H       | -1.50449600 | 3.35890700  | -0.04157700 |
|          |             |             |             | H       | -2.86366900 | 2.55068700  | -0.84416100 |
|          |             |             |             | H       | -2.76408700 | 2.58044200  | 0.93239200  |
| DMHP-RC2 |             |             |             | DMHP-TS |             |             |             |
| O        | -1.69464100 | 0.08607100  | -0.77171500 | O       | 1.27356800  | -1.19447600 | -0.01934200 |
| H        | -0.83365000 | -0.32137800 | -0.93951200 | C       | 2.38606300  | -1.94520300 | -0.50782200 |
| O        | 0.72735100  | -1.23929600 | -1.15911300 | H       | 1.25380300  | -0.30484200 | -0.44096600 |
| O        | 2.23095500  | -0.82368600 | 0.88495400  | H       | 2.39720900  | -1.90657800 | -1.59515100 |
| H        | 1.54399000  | -0.18666500 | 1.15156600  | H       | 2.20821400  | -2.97109000 | -0.20751300 |
| N        | 0.25900500  | 1.21510500  | 1.43712200  | O       | 1.23866100  | 1.27210600  | -1.01256100 |
| C        | -0.78882600 | 0.77728000  | 1.84968800  | O       | -0.46033600 | 1.48168500  | 0.87969600  |
| O        | -1.70663100 | 0.27050000  | 2.34146600  | H       | -0.69519700 | 0.54541000  | 0.63774200  |
| C        | 0.60327700  | 2.35837000  | 0.68858400  | C       | -0.41690800 | -2.02826800 | -0.03129400 |
| C        | -0.33841700 | 3.05105900  | -0.06364900 | C       | -5.35299700 | -1.43312000 | 0.14670000  |
| C        | 1.92866100  | 2.76903400  | 0.71271300  | C       | -4.56489800 | -2.54087000 | 0.42040500  |
| C        | 0.05599900  | 4.16837000  | -0.78030900 | C       | -4.74400600 | -0.21973900 | -0.13853700 |
| H        | -1.35608500 | 2.70148600  | -0.10073100 | C       | -3.36333300 | -0.11444900 | -0.15044700 |
| C        | 2.31070700  | 3.88802000  | -0.01007900 | C       | -2.57240100 | -1.22719400 | 0.12066500  |
| H        | 2.64679500  | 2.21904100  | 1.29819200  | C       | -3.18212300 | -2.44511400 | 0.41076700  |
| C        | 1.37747000  | 4.59230400  | -0.75566800 | H       | -2.58427800 | -3.31313400 | 0.63125000  |
| H        | -0.67422800 | 4.70626500  | -1.36301900 | H       | -5.02518200 | -3.48930900 | 0.64702400  |
| H        | 3.33979800  | 4.20762900  | 0.01293700  | H       | -5.34307400 | 0.65031800  | -0.35463600 |
| H        | 1.67701100  | 5.46251000  | -1.31654100 | H       | -2.89005900 | 0.82586900  | -0.38010000 |
| C        | -2.65696900 | -0.94161000 | -0.72543800 | N       | -1.16664900 | -1.03294800 | 0.10781500  |
| H        | -2.44957300 | -1.63014800 | 0.09730000  | O       | -0.19459600 | -3.17111700 | -0.15662900 |
| H        | -2.63437400 | -1.52828000 | -1.64754300 | H       | -6.42771800 | -1.51434800 | 0.15619100  |
| C        | -4.02859600 | -0.32883500 | -0.54565500 | C       | 3.68255300  | -1.42395600 | 0.07568100  |
| H        | -4.21096000 | 0.36365500  | -1.36808100 | H       | 3.80881100  | -0.37906800 | -0.20780600 |
| H        | -4.02757000 | 0.26299700  | 0.36989700  | H       | 3.61430800  | -1.45468000 | 1.16252300  |
| C        | -5.14041600 | -1.36783600 | -0.48844400 | C       | 4.88568400  | -2.23240300 | -0.39436100 |
| H        | -4.94549300 | -2.06099200 | 0.33060300  | H       | 4.93216100  | -2.21128600 | -1.48333200 |
| H        | -5.12686700 | -1.96273800 | -1.40238300 | H       | 4.75004600  | -3.27659900 | -0.11193800 |
| C        | -6.51864200 | -0.74870200 | -0.30929600 | C       | 6.19681200  | -1.71655600 | 0.17923700  |

|         |             |             |             |             |             |             |             |
|---------|-------------|-------------|-------------|-------------|-------------|-------------|-------------|
| H       | -6.75591200 | -0.07453800 | -1.13100600 | H           | 7.03967400  | -2.31002700 | -0.16895600 |
| H       | -7.29399800 | -1.51144900 | -0.27242900 | H           | 6.37412000  | -0.68333500 | -0.11508300 |
| H       | -6.57421300 | -0.17478600 | 0.61454800  | H           | 6.19115400  | -1.75422700 | 1.26742600  |
| P       | 1.77714700  | -1.79034300 | -0.28711000 | P           | 0.39689100  | 2.20196300  | -0.22629100 |
| O       | 1.33445000  | -3.15206300 | 0.36454500  | O           | 1.15121100  | 3.34078300  | 0.55943800  |
| O       | 3.14169400  | -2.17007300 | -0.97819000 | O           | -0.56622400 | 3.01510600  | -1.16644700 |
| C       | 2.17051500  | -3.86681300 | 1.28168800  | C           | 2.06481200  | 3.02084600  | 1.61597600  |
| H       | 2.44205700  | -3.23250200 | 2.11823500  | H           | 2.49797600  | 3.95798100  | 1.93867600  |
| H       | 1.58605000  | -4.70641000 | 1.63372800  | H           | 1.53480300  | 2.55545500  | 2.43921200  |
| H       | 3.06056000  | -4.22328900 | 0.77606800  | H           | 2.84605500  | 2.36209800  | 1.25242400  |
| C       | 3.93194100  | -1.17082800 | -1.63324000 | C           | -1.47085900 | 4.00255300  | -0.65669000 |
| H       | 3.35863300  | -0.69477700 | -2.42112100 | H           | -2.05858700 | 3.59724000  | 0.15950200  |
| H       | 4.26940800  | -0.43119300 | -0.91575400 | H           | -0.91809300 | 4.87310400  | -0.32340900 |
| H       | 4.78272200  | -1.68554200 | -2.05910600 | H           | -2.12163900 | 4.27036500  | -1.47833600 |
| DMHP-PC |             |             |             |             |             |             |             |
|         | O           | 0.39666400  | -1.53900400 | -0.08899900 |             |             |             |
|         | C           | 1.25406600  | -2.69900800 | -0.11987400 |             |             |             |
|         | H           | 1.15719800  | -0.04555600 | -0.80507000 |             |             |             |
|         | H           | 0.97823100  | -3.34385200 | 0.70708900  |             |             |             |
|         | H           | 1.08146200  | -3.23242600 | -1.04790400 |             |             |             |
|         | O           | 1.53032100  | 0.81624800  | -1.06449200 |             |             |             |
|         | O           | -0.16821800 | 1.78751600  | 0.60948800  |             |             |             |
|         | H           | -1.08215300 | 0.18611500  | 0.28288800  |             |             |             |
|         | N           | -1.62277900 | -0.64809600 | 0.08236100  |             |             |             |
|         | C           | -0.93369900 | -1.79064500 | -0.11005200 |             |             |             |
|         | O           | -1.37926800 | -2.89854700 | -0.27819000 |             |             |             |
|         | C           | -3.01592200 | -0.48582300 | 0.09322800  |             |             |             |
|         | C           | -3.48971300 | 0.80127500  | 0.35033000  |             |             |             |
|         | C           | -3.92462300 | -1.51560600 | -0.13832200 |             |             |             |
|         | C           | -4.84906300 | 1.05322300  | 0.37666800  |             |             |             |
|         | H           | -2.78439400 | 1.59721100  | 0.52786200  |             |             |             |
|         | C           | -5.28541600 | -1.24564600 | -0.10865800 |             |             |             |
|         | H           | -3.57243300 | -2.50948100 | -0.33494500 |             |             |             |
|         | C           | -5.75931700 | 0.03072900  | 0.14724000  |             |             |             |
|         | H           | -5.19574400 | 2.05440100  | 0.57733500  |             |             |             |
|         | H           | -5.97889000 | -2.05174900 | -0.28902100 |             |             |             |
|         | H           | -6.81889200 | 0.22710500  | 0.16787400  |             |             |             |
|         | C           | 2.68508600  | -2.23200400 | -0.00096500 |             |             |             |
|         | H           | 2.93627900  | -1.59882200 | -0.85103000 |             |             |             |
|         | H           | 2.79082600  | -1.62557600 | 0.89795300  |             |             |             |
|         | C           | 3.65058000  | -3.41039600 | 0.05448700  |             |             |             |
|         | H           | 3.52179900  | -4.02461100 | -0.83659500 |             |             |             |
|         | H           | 3.39831300  | -4.04241900 | 0.90565400  |             |             |             |
|         | C           | 5.10133300  | -2.96643100 | 0.16135200  |             |             |             |
|         | H           | 5.77184500  | -3.82220300 | 0.20158500  |             |             |             |
|         | H           | 5.38986100  | -2.35828900 | -0.69443600 |             |             |             |
|         | H           | 5.26491500  | -2.37347700 | 1.05975800  |             |             |             |
|         | P           | 1.13942000  | 1.95955500  | -0.04834600 |             |             |             |
|         | O           | 2.28483900  | 2.05784600  | 1.03602900  |             |             |             |
|         | O           | 1.30084000  | 3.21143500  | -0.99386600 |             |             |             |
|         | C           | 1.03039100  | 4.52579800  | -0.48876800 |             |             |             |

|         |             |             |             |             |         |             |             |
|---------|-------------|-------------|-------------|-------------|---------|-------------|-------------|
|         | H           | 1.68959800  | 4.75853400  | 0.34090800  |         |             |             |
|         | H           | 1.21674000  | 5.20902000  | -1.30618400 |         |             |             |
|         | H           | -0.00453100 | 4.59982100  | -0.17422900 |         |             |             |
|         | C           | 3.66339400  | 2.17512900  | 0.66489600  |         |             |             |
|         | H           | 3.98011900  | 1.29527800  | 0.11619600  |         |             |             |
|         | H           | 3.82289000  | 3.06464300  | 0.06516300  |         |             |             |
|         | H           | 4.22109600  | 2.25215000  | 1.58867500  |         |             |             |
| MSA     |             |             |             |             | MSA-RC1 |             |             |
| H       | 0.95344100  | -1.81948300 | -0.13944500 |             | O       | 0.77905800  | -1.13399600 |
| O       | 0.76762500  | -1.08225600 | -0.74172800 |             | C       | 1.76404100  | -0.56570100 |
| S       | 0.08919800  | 0.12919200  | 0.05641200  |             | H       | -0.02106300 | -1.25737000 |
| O       | 0.51821600  | 0.05525500  | 1.43370500  |             | H       | 1.40187400  | 0.36427800  |
| O       | 0.37480600  | 1.30615700  | -0.72240600 |             | H       | 2.00383600  | -1.24414600 |
| C       | -1.62857100 | -0.25321900 | -0.05200600 |             | C       | 3.00483200  | -0.29480600 |
| H       | -1.90758900 | -0.31111000 | -1.09742800 |             | H       | 2.74001300  | 0.36843400  |
| H       | -2.17326100 | 0.54566600  | 0.44000900  |             | H       | 3.33900200  | -1.23191600 |
| H       | -1.81351700 | -1.19607400 | 0.44974300  |             | C       | 4.13305000  | 0.32093600  |
|         |             |             |             |             | H       | 3.78702200  | 1.25233700  |
|         |             |             |             |             | H       | 4.38477100  | -0.34327100 |
|         |             |             |             |             | C       | 5.38004200  | 0.59182900  |
|         |             |             |             |             | H       | 6.16956100  | 1.03232800  |
|         |             |             |             |             | H       | 5.16685100  | 1.27905700  |
|         |             |             |             |             | H       | 5.76964900  | -0.32729200 |
|         |             |             |             |             | O       | -1.84774800 | -0.88638600 |
|         |             |             |             |             | O       | -3.17210700 | -0.51038800 |
|         |             |             |             |             | O       | -3.71991700 | 0.75889700  |
|         |             |             |             |             | H       | -2.59138400 | -1.22162700 |
|         |             |             |             |             | S       | -2.59424500 | 0.13857100  |
|         |             |             |             |             | C       | -1.47773900 | 1.36220600  |
|         |             |             |             |             | H       | -0.66180600 | 0.86242600  |
|         |             |             |             |             | H       | -1.10534000 | 1.91129600  |
|         |             |             |             |             | H       | -2.01471000 | 2.02652500  |
| MSA-RC2 |             |             |             |             | MSA-TS  |             |             |
| O       | -1.50498600 | -0.07992400 | -0.68311200 |             | O       | 1.58237800  | 0.11013700  |
| H       | -0.76118800 | -0.68509200 | -0.75691500 |             | C       | 2.89896600  | -0.17138800 |
| O       | 0.57199000  | -2.07279200 | -0.63626800 |             | H       | 1.22713800  | 0.92824300  |
| S       | 1.91558900  | -2.43986500 | -0.22768100 |             | H       | 3.31023000  | 0.76182500  |
| O       | 2.24750700  | -1.68038600 | 1.12528900  |             | H       | 2.81090500  | -0.86605200 |
| O       | 2.21524100  | -3.82887000 | 0.00145200  |             | O       | 0.34619700  | 2.36400200  |
| H       | 1.70541800  | -0.86684200 | 1.22348300  |             | S       | -0.54607100 | 2.88949500  |
| N       | 0.72714500  | 0.71742300  | 1.36924800  |             | O       | -0.71912900 | 1.78537300  |
| C       | -0.35884100 | 0.51392400  | 1.86508500  |             | O       | -0.16695500 | 4.10748700  |
| O       | -1.32824200 | 0.22098200  | 2.42342300  |             | H       | -0.67704000 | 0.84330900  |
| C       | 1.21343600  | 1.78251000  | 0.57989200  |             | C       | 0.30762700  | -1.24941000 |
| C       | 0.35341000  | 2.66925500  | -0.05694100 |             | C       | -4.45192200 | -2.57965100 |
| C       | 2.58852500  | 1.91313100  | 0.44668700  |             | C       | -3.40756000 | -3.20813700 |
| C       | 0.88215900  | 3.69670500  | -0.81967100 |             | C       | -4.23623500 | -1.34005400 |
| H       | -0.71199900 | 2.54047000  | 0.03185500  |             | C       | -2.99272800 | -0.73556800 |
| C       | 3.10517800  | 2.94450800  | -0.32216800 |             | C       | -1.94367400 | -1.36678600 |
| H       | 3.24362900  | 1.22045900  | 0.94860700  |             | C       | -2.15917900 | -2.61174500 |
| C       | 2.25618600  | 3.83942000  | -0.95511800 |             | H       | -1.36305700 | -3.11606400 |

|       |             |             |             |             |             |             |             |
|-------|-------------|-------------|-------------|-------------|-------------|-------------|-------------|
| H     | 0.21501100  | 4.38529800  | -1.31231300 | H           | -3.55979600 | -4.17171300 | -0.85056700 |
| H     | 4.17350100  | 3.04671700  | -0.42157100 | H           | -5.03661400 | -0.83753600 | 1.37175700  |
| H     | 2.66063800  | 4.64087500  | -1.55135700 | H           | -2.83225100 | 0.22530200  | 1.23596900  |
| C     | 3.07339100  | -1.75677300 | -1.36662500 | N           | -0.70387000 | -0.67535000 | 0.07229000  |
| H     | 4.07508200  | -1.94916500 | -1.00030100 | O           | 0.86879300  | -2.16061600 | -0.87955600 |
| H     | 2.92036300  | -2.24664200 | -2.32239700 | H           | -5.41993300 | -3.04965900 | 0.32951700  |
| H     | 2.89377600  | -0.69160300 | -1.45595500 | C           | 3.74923700  | -0.74518500 | 0.37432900  |
| C     | -2.68119800 | -0.84990100 | -0.54973100 | H           | 3.79456900  | -0.02675100 | 1.19186700  |
| H     | -2.63768700 | -1.46572000 | 0.35074900  | H           | 3.26714200  | -1.64199700 | 0.76213900  |
| H     | -2.79086900 | -1.52678300 | -1.40016000 | C           | 5.15607100  | -1.08224300 | -0.10365400 |
| C     | -3.87050500 | 0.08184800  | -0.48015900 | H           | 5.62438200  | -0.18515800 | -0.50930600 |
| H     | -3.88317900 | 0.69847800  | -1.37931500 | H           | 5.09684300  | -1.79712000 | -0.92451400 |
| H     | -3.73473800 | 0.75826600  | 0.36412000  | C           | 6.02777800  | -1.65267500 | 1.00475000  |
| C     | -5.19412500 | -0.65840400 | -0.34159000 | H           | 7.02536800  | -1.88749600 | 0.63946100  |
| H     | -5.17070900 | -1.27539500 | 0.55722400  | H           | 6.13273900  | -0.94460900 | 1.82521000  |
| H     | -5.31401100 | -1.34435100 | -1.18084600 | H           | 5.59869700  | -2.56759500 | 1.41024500  |
| C     | -6.39047700 | 0.27951300  | -0.28081800 | C           | -2.15379400 | 3.05809700  | -0.72759200 |
| H     | -6.45966700 | 0.88594200  | -1.18267500 | H           | -2.45121300 | 2.10660800  | -1.15319300 |
| H     | -7.32244100 | -0.27342500 | -0.18117700 | H           | -2.84098000 | 3.36300800  | 0.05301700  |
| H     | -6.31528800 | 0.95790000  | 0.56776100  | H           | -2.10069700 | 3.81639900  | -1.50161600 |
| MSA-P |             |             |             |             |             |             |             |
|       | O           | -1.02531900 | -0.98082900 | -0.00407700 |             |             |             |
|       | C           | -2.12955200 | -1.87453700 | 0.26210300  |             |             |             |
|       | H           | -1.38217300 | 0.68977500  | 0.48051600  |             |             |             |
|       | H           | -1.93320800 | -2.81015700 | -0.24780900 |             |             |             |
|       | H           | -2.16968700 | -2.06250800 | 1.32970300  |             |             |             |
|       | O           | -1.62503100 | 1.59812500  | 0.76241100  |             |             |             |
|       | S           | -0.71976900 | 2.67784700  | 0.03122800  |             |             |             |
|       | O           | -0.03265200 | 2.00430800  | -1.05851600 |             |             |             |
|       | O           | -1.55795900 | 3.80864200  | -0.26858800 |             |             |             |
|       | H           | 0.79551300  | 0.21133700  | -0.70388000 |             |             |             |
|       | N           | 1.14282800  | -0.62177800 | -0.25332200 |             |             |             |
|       | C           | 0.21223400  | -1.49629000 | 0.18467600  |             |             |             |
|       | O           | 0.39796500  | -2.58044200 | 0.67525500  |             |             |             |
|       | C           | 2.53914300  | -0.75977200 | -0.20158000 |             |             |             |
|       | C           | 3.29104500  | 0.27280700  | -0.76103500 |             |             |             |
|       | C           | 3.19064300  | -1.84733500 | 0.37403900  |             |             |             |
|       | C           | 4.67277200  | 0.21810500  | -0.74718400 |             |             |             |
|       | H           | 2.78811700  | 1.11729800  | -1.20526500 |             |             |             |
|       | C           | 4.57752800  | -1.88692900 | 0.38022100  |             |             |             |
|       | H           | 2.62281300  | -2.64802000 | 0.80645900  |             |             |             |
|       | C           | 5.32783200  | -0.86366800 | -0.17586500 |             |             |             |
|       | H           | 5.23654600  | 1.02580200  | -1.18565100 |             |             |             |
|       | H           | 5.07069400  | -2.73472800 | 0.82857200  |             |             |             |
|       | H           | 6.40465700  | -0.90700800 | -0.16528600 |             |             |             |
|       | C           | 0.44598200  | 3.10990500  | 1.27962800  |             |             |             |
|       | H           | 1.10117600  | 3.87056300  | 0.86850300  |             |             |             |
|       | H           | -0.09046100 | 3.49846700  | 2.13738500  |             |             |             |
|       | H           | 1.01468800  | 2.22680600  | 1.54793400  |             |             |             |
|       | C           | -3.39498800 | -1.22505100 | -0.24446000 |             |             |             |
|       | H           | -3.56327100 | -0.28387600 | 0.27727200  |             |             |             |

|           |             |             |             |             |           |             |             |             |  |
|-----------|-------------|-------------|-------------|-------------|-----------|-------------|-------------|-------------|--|
|           | H           | -3.27674100 | -0.99156400 | -1.30161400 |           |             |             |             |  |
|           | C           | -4.60039900 | -2.13703400 | -0.04625400 |           |             |             |             |  |
|           | H           | -4.69954900 | -2.37958800 | 1.01171800  |           |             |             |             |  |
|           | H           | -4.42753200 | -3.07966900 | -0.56519900 |           |             |             |             |  |
|           | C           | -5.89172200 | -1.50917500 | -0.54762300 |           |             |             |             |  |
|           | H           | -6.73688200 | -2.17736200 | -0.39665900 |           |             |             |             |  |
|           | H           | -6.10572100 | -0.57899300 | -0.02379300 |           |             |             |             |  |
|           | H           | -5.83162600 | -1.28425400 | -1.61117400 |           |             |             |             |  |
| TFMSA     |             |             |             |             | TFMSA-RC1 |             |             |             |  |
| O         | 1.22592300  | 0.00175700  | 1.43348700  |             | O         | -1.34478400 | -1.64088400 | -0.57612300 |  |
| S         | 0.83788000  | -0.13527600 | 0.05946000  |             | C         | -2.11291100 | -0.88667000 | 0.33695600  |  |
| O         | 1.24651900  | 1.15320800  | -0.75838200 |             | H         | -0.49487000 | -1.81924300 | -0.16959300 |  |
| O         | 1.20220700  | -1.26995000 | -0.73123200 |             | H         | -1.57184900 | 0.00783600  | 0.65095100  |  |
| H         | 1.36281700  | 1.92694300  | -0.17794700 |             | H         | -2.32278500 | -1.46903900 | 1.23776100  |  |
| C         | -0.98760200 | 0.00908100  | -0.00246500 |             | C         | -3.41057600 | -0.49105000 | -0.33202300 |  |
| F         | -1.50623800 | -0.98080400 | 0.68906900  |             | H         | -3.17763200 | 0.07778800  | -1.23259000 |  |
| F         | -1.39511600 | -0.05554700 | -1.24863600 |             | H         | -3.92684900 | -1.39523800 | -0.65566800 |  |
| F         | -1.34758800 | 1.15889100  | 0.52516600  |             | C         | -4.31911900 | 0.32653200  | 0.57628400  |  |
|           |             |             |             |             | H         | -3.78994500 | 1.22153800  | 0.90506700  |  |
|           |             |             |             |             | H         | -4.54057600 | -0.24671000 | 1.47710300  |  |
|           |             |             |             |             | C         | -5.62133800 | 0.72878000  | -0.09987600 |  |
|           |             |             |             |             | H         | -6.25160100 | 1.31114500  | 0.56934500  |  |
|           |             |             |             |             | H         | -5.43309900 | 1.33230400  | -0.98659300 |  |
|           |             |             |             |             | H         | -6.18874100 | -0.14697100 | -0.41130600 |  |
|           |             |             |             |             | O         | 1.38861300  | -1.50548200 | 0.57224700  |  |
|           |             |             |             |             | O         | 3.03194900  | -0.75151000 | -1.11664100 |  |
|           |             |             |             |             | O         | 3.35437100  | -0.07937700 | 1.19311100  |  |
|           |             |             |             |             | H         | 2.51328700  | -1.36838000 | -1.66440400 |  |
|           |             |             |             |             | S         | 2.33532900  | -0.46530900 | 0.26895300  |  |
|           |             |             |             |             | C         | 1.37300600  | 1.03812400  | -0.15120100 |  |
|           |             |             |             |             | F         | 0.72615400  | 1.42850800  | 0.92437800  |  |
|           |             |             |             |             | F         | 0.51958700  | 0.74968300  | -1.10743600 |  |
|           |             |             |             |             | F         | 2.19024000  | 1.98443700  | -0.54860100 |  |
| TFMSA-RC2 |             |             |             |             | TFMSA-TS  |             |             |             |  |
| O         | -2.00400900 | -0.16760500 | -0.76478200 |             | O         | 2.14758700  | -0.29825400 | 0.41686200  |  |
| C         | -3.00944500 | -1.15332400 | -0.63476000 |             | C         | 3.48373100  | -0.22845800 | 0.89177600  |  |
| H         | -1.15556400 | -0.61160000 | -0.83198100 |             | H         | 1.61771100  | -0.83659300 | 1.01338500  |  |
| H         | -2.85380200 | -1.74227800 | 0.27117300  |             | H         | 3.75894400  | -1.17955600 | 1.34581000  |  |
| H         | -2.97615900 | -1.84273300 | -1.48098300 |             | H         | 3.56675000  | 0.54012700  | 1.66159100  |  |
| O         | 0.56244600  | -1.62206900 | -0.62605300 |             | O         | -0.02739700 | -1.87905700 | 1.23922800  |  |
| S         | 1.67820200  | -1.94278800 | 0.22688900  |             | S         | -0.57427300 | -2.13797100 | -0.08117100 |  |
| O         | 1.63683200  | -1.08486800 | 1.53193700  |             | O         | -0.41712300 | -0.94983600 | -1.00098300 |  |
| O         | 1.97789500  | -3.29660600 | 0.57951700  |             | O         | -0.23722800 | -3.37460600 | -0.73830400 |  |
| H         | 1.02660000  | -0.29926000 | 1.46458000  |             | H         | -0.16390200 | 0.14816400  | -0.52245300 |  |
| C         | 3.16860900  | -1.25304700 | -0.58333600 |             | C         | -2.38290200 | -2.17635000 | 0.16459200  |  |
| F         | 3.35150600  | -1.88021500 | -1.72403500 |             | F         | -2.69675900 | -3.15187200 | 0.99544200  |  |
| F         | 4.21358400  | -1.42741100 | 0.19306100  |             | F         | -2.99467900 | -2.37532100 | -0.98675800 |  |
| F         | 2.98885700  | 0.03076700  | -0.80528500 |             | F         | -2.78948900 | -1.02789300 | 0.67427100  |  |
| N         | -0.07727500 | 1.07139100  | 1.38587700  |             | C         | 0.97065400  | 1.87141400  | 0.17481600  |  |
| C         | -1.17952400 | 0.78116100  | 1.80655400  |             | C         | -3.73739000 | 3.42138500  | -0.19783500 |  |
| O         | -2.16125800 | 0.42067100  | 2.29453800  |             | C         | -2.78986800 | 3.72365400  | 0.76854800  |  |

|          |             |             |             |             |             |             |             |
|----------|-------------|-------------|-------------|-------------|-------------|-------------|-------------|
| C        | 0.33186700  | 2.17954700  | 0.60054700  | C           | -3.47657500 | 2.43456800  | -1.13680700 |
| C        | -0.56063700 | 2.84990200  | -0.22612300 | C           | -2.27040800 | 1.75240100  | -1.12195700 |
| C        | 1.66217700  | 2.56443600  | 0.66997200  | C           | -1.33482100 | 2.07086000  | -0.15165500 |
| C        | -0.11110300 | 3.92408200  | -0.97583800 | C           | -1.58305600 | 3.04362700  | 0.80275400  |
| H        | -1.58326300 | 2.51899600  | -0.29429500 | H           | -0.85650800 | 3.26216200  | 1.56863700  |
| C        | 2.09957300  | 3.63959700  | -0.08748700 | H           | -2.98822800 | 4.48388500  | 1.50581100  |
| H        | 2.34165100  | 2.03335400  | 1.31561500  | H           | -4.20947800 | 2.19344000  | -1.88888200 |
| C        | 1.21640200  | 4.32319200  | -0.90927800 | H           | -2.05987400 | 0.99160500  | -1.85377800 |
| H        | -0.80244400 | 4.44607700  | -1.61725300 | N           | -0.09738200 | 1.32891300  | -0.14899400 |
| H        | 3.13272700  | 3.94121400  | -0.03105100 | O           | 1.89248400  | 2.48316800  | 0.45953700  |
| H        | 1.55991600  | 5.15887600  | -1.49671100 | H           | -4.67611300 | 3.95001400  | -0.21680500 |
| C        | -4.35673400 | -0.46871700 | -0.58182300 | C           | 4.40801100  | 0.08272400  | -0.26435000 |
| H        | -4.36089900 | 0.22792500  | 0.25643200  | H           | 4.30397400  | -0.70146100 | -1.01399400 |
| H        | -4.48108000 | 0.12548800  | -1.48747400 | H           | 4.08792400  | 1.01285600  | -0.73425000 |
| C        | -5.51298900 | -1.45032000 | -0.44391500 | C           | 5.86374600  | 0.19975300  | 0.16796700  |
| H        | -5.37494200 | -2.04662100 | 0.45854800  | H           | 6.17282800  | -0.72818900 | 0.65006200  |
| H        | -5.49485700 | -2.15022100 | -1.27986000 | H           | 5.95515600  | 0.98242500  | 0.92155600  |
| C        | -6.86765200 | -0.75978400 | -0.39120400 | C           | 6.79924700  | 0.50252200  | -0.99293300 |
| H        | -7.67615500 | -1.48123500 | -0.29105800 | H           | 7.83157400  | 0.58151300  | -0.65806700 |
| H        | -6.92681400 | -0.07604800 | 0.45431400  | H           | 6.75443100  | -0.28118300 | -1.74760000 |
| H        | -7.04924300 | -0.18185400 | -1.29614600 | H           | 6.53441200  | 1.44178000  | -1.47612900 |
| TFMSA-PC |             |             |             |             |             |             |             |
|          | O           | -1.22165200 | -1.29751700 | 0.00867100  |             |             |             |
|          | C           | -2.39092200 | -2.06169500 | 0.39794600  |             |             |             |
|          | H           | -1.40742100 | 0.34653400  | 0.33305200  |             |             |             |
|          | H           | -2.25844400 | -3.07391000 | 0.03616100  |             |             |             |
|          | H           | -2.44056700 | -2.08057100 | 1.48097200  |             |             |             |
|          | O           | -1.57313900 | 1.30843900  | 0.51940600  |             |             |             |
|          | S           | -0.77324500 | 2.24194100  | -0.44808200 |             |             |             |
|          | O           | -0.21892600 | 1.46575500  | -1.52887300 |             |             |             |
|          | O           | -1.53541300 | 3.42738000  | -0.69234500 |             |             |             |
|          | H           | 0.66653300  | -0.43677800 | -0.95630500 |             |             |             |
|          | C           | 0.62656000  | 2.70869100  | 0.63692700  |             |             |             |
|          | F           | 0.17851000  | 3.36028300  | 1.68480000  |             |             |             |
|          | F           | 1.44826700  | 3.47282500  | -0.04749600 |             |             |             |
|          | F           | 1.25324600  | 1.61817400  | 1.02460400  |             |             |             |
|          | N           | 0.95981300  | -1.19012100 | -0.35734300 |             |             |             |
|          | C           | -0.02076200 | -1.88485700 | 0.25486300  |             |             |             |
|          | O           | 0.08922800  | -2.87591900 | 0.92720400  |             |             |             |
|          | C           | 2.34551600  | -1.41942500 | -0.28878700 |             |             |             |
|          | C           | 3.16836700  | -0.48276500 | -0.91219200 |             |             |             |
|          | C           | 2.91536800  | -2.51383300 | 0.35500100  |             |             |             |
|          | C           | 4.54222900  | -0.64022100 | -0.89513000 |             |             |             |
|          | H           | 2.72952600  | 0.36947300  | -1.40677100 |             |             |             |
|          | C           | 4.29558300  | -2.65497800 | 0.36688600  |             |             |             |
|          | H           | 2.29153900  | -3.24158100 | 0.83638100  |             |             |             |
|          | C           | 5.11706000  | -1.72823100 | -0.25386100 |             |             |             |
|          | H           | 5.16276700  | 0.09377600  | -1.38354400 |             |             |             |
|          | H           | 4.72632500  | -3.50699100 | 0.86823300  |             |             |             |
|          | H           | 6.18771200  | -1.85048800 | -0.23932600 |             |             |             |
|          | C           | -3.60680800 | -1.40977900 | -0.21491900 |             |             |             |



|   |             |             |             |
|---|-------------|-------------|-------------|
| H | -3.70986300 | -0.39072700 | 0.15556500  |
| H | -3.47348100 | -1.35006200 | -1.29402100 |
| C | -4.87280900 | -2.19479400 | 0.10966800  |
| H | -4.98454500 | -2.26853400 | 1.19127300  |
| H | -4.76938700 | -3.21416800 | -0.26151900 |
| C | -6.11797800 | -1.55829200 | -0.48828900 |
| H | -7.00792700 | -2.13444000 | -0.24435900 |
| H | -6.26229000 | -0.54751900 | -0.11034500 |
| H | -6.04666400 | -1.49978000 | -1.57309100 |
